# Supplementary material
Source: Frontiers journal article supplement (https://www.frontiersin.org/articles/164306)

## Supplemental File 1

*Arabidopsis thaliana* seedling growth in the presence of *Pseudomonas* isolate strains. Plants were grown on MS + 1% sucrose, then transferred to new plates and streaked with bacteria. Plants grown in the absence of bacteria were used as controls. Plant root growth or inhibition was assessed visually. The following slides show plants paired with respective control plants.

Control

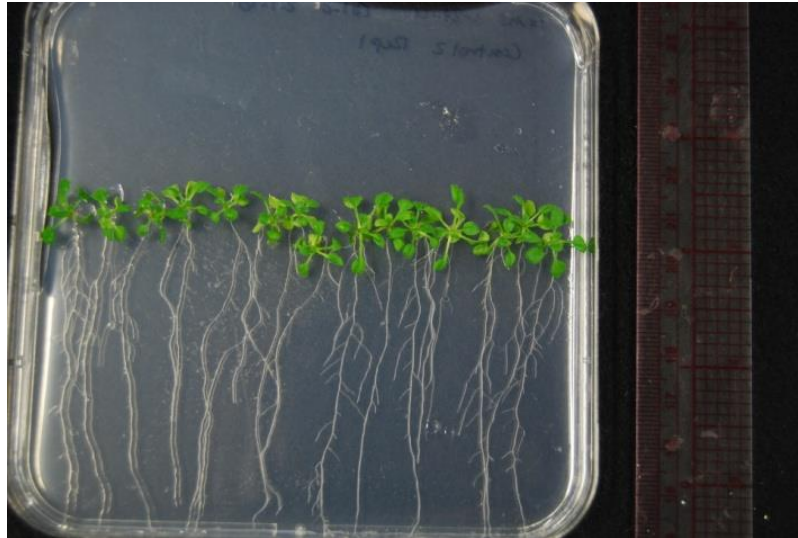

GM25

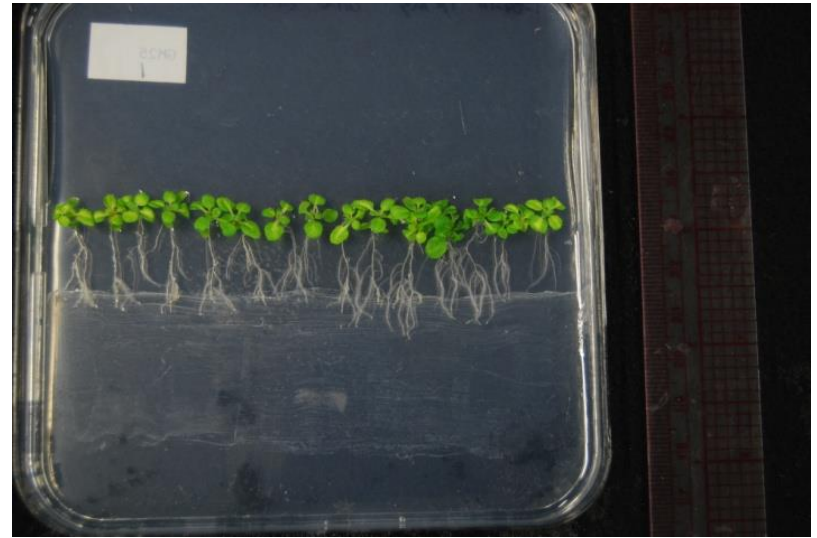

Control

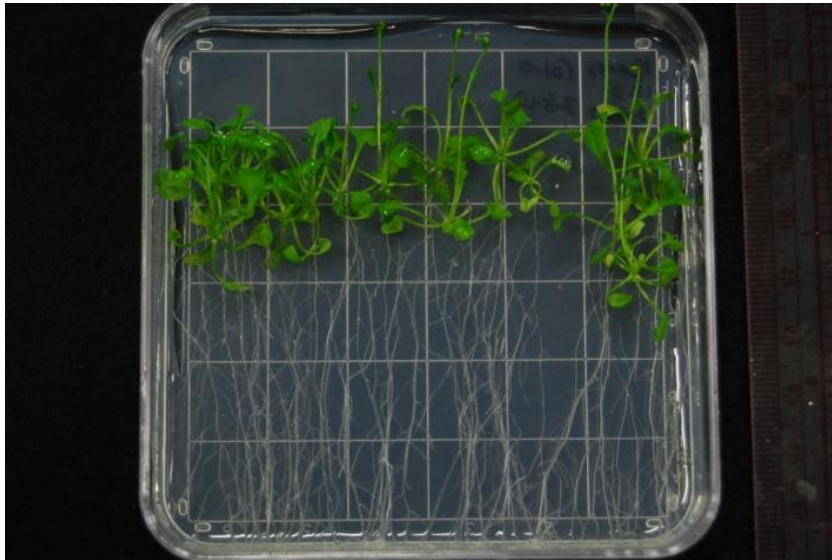

GM48

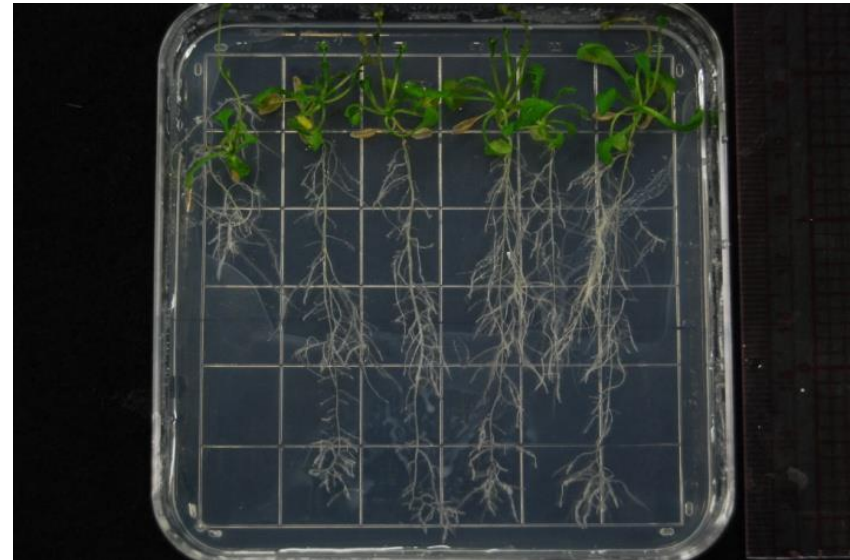

Control

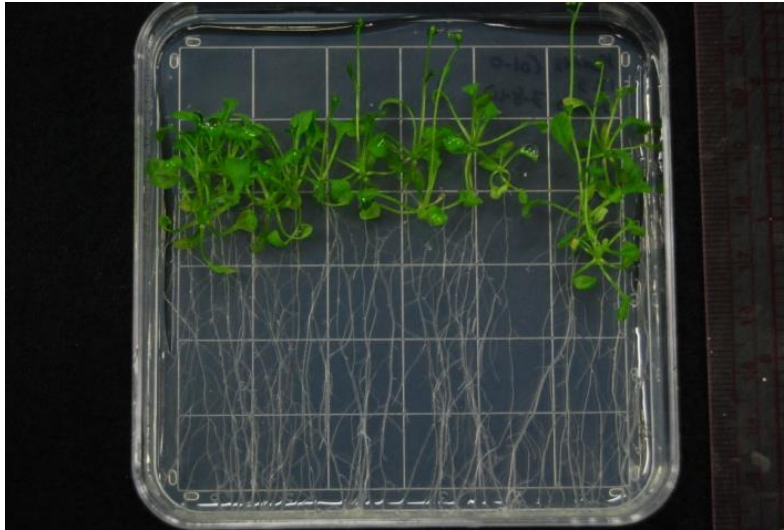

GM49

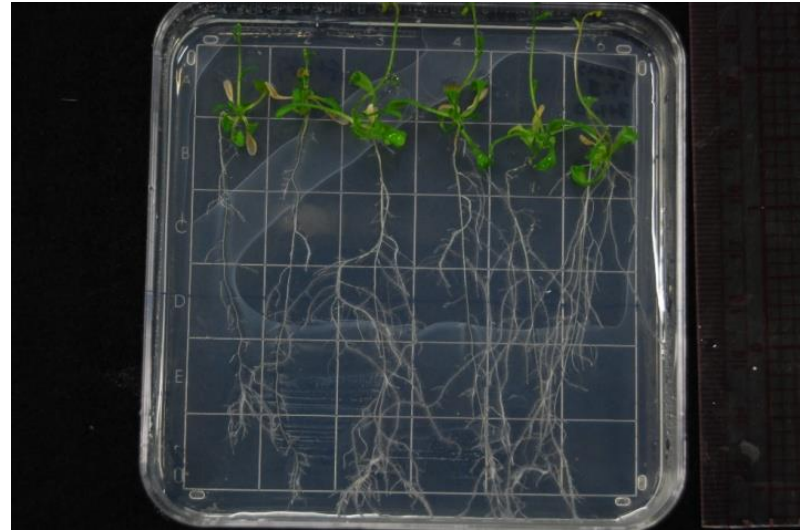

Control

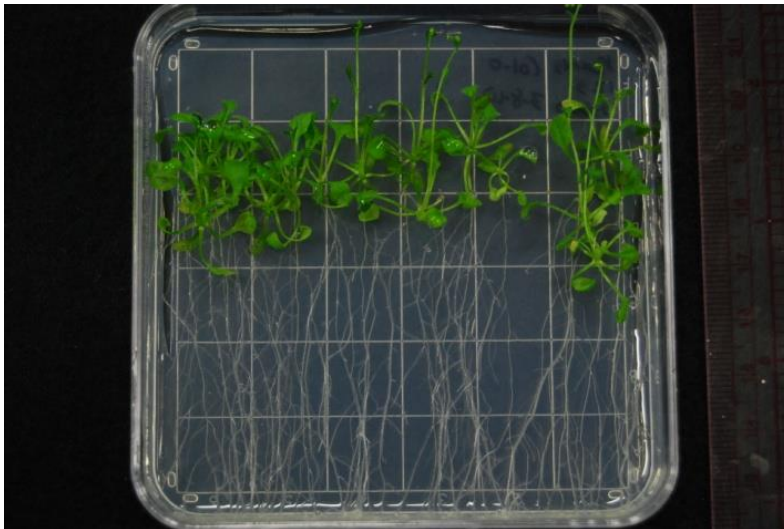

GM74

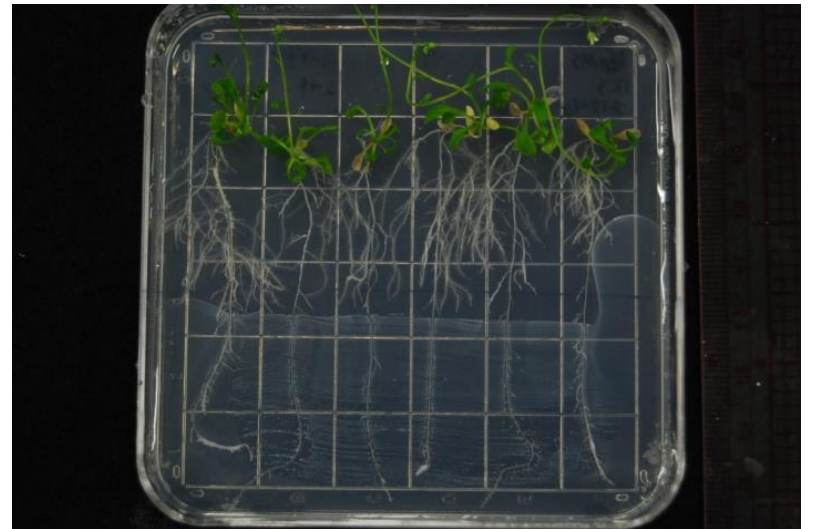



Control

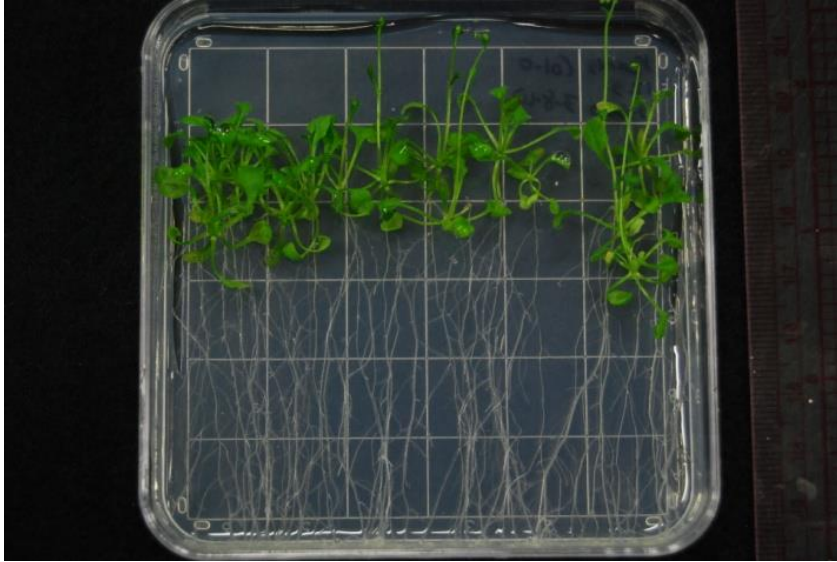

GM16

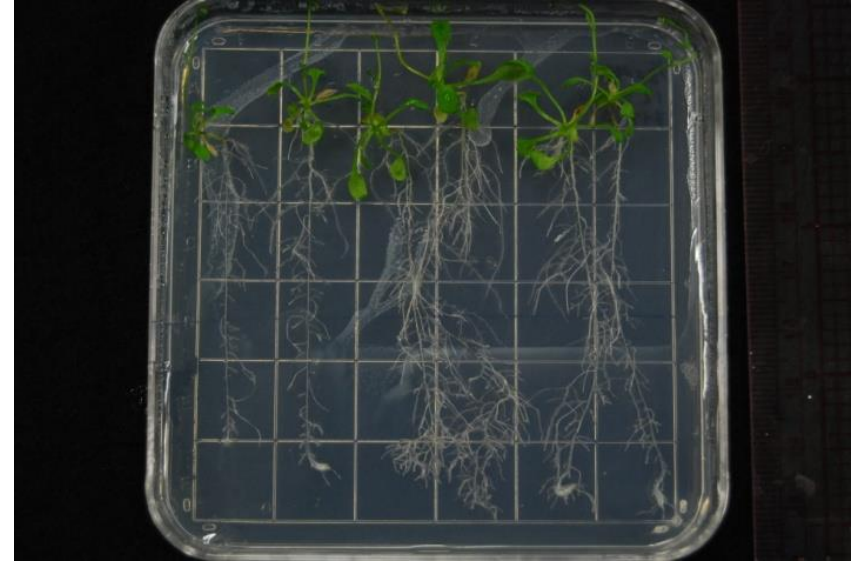

Control

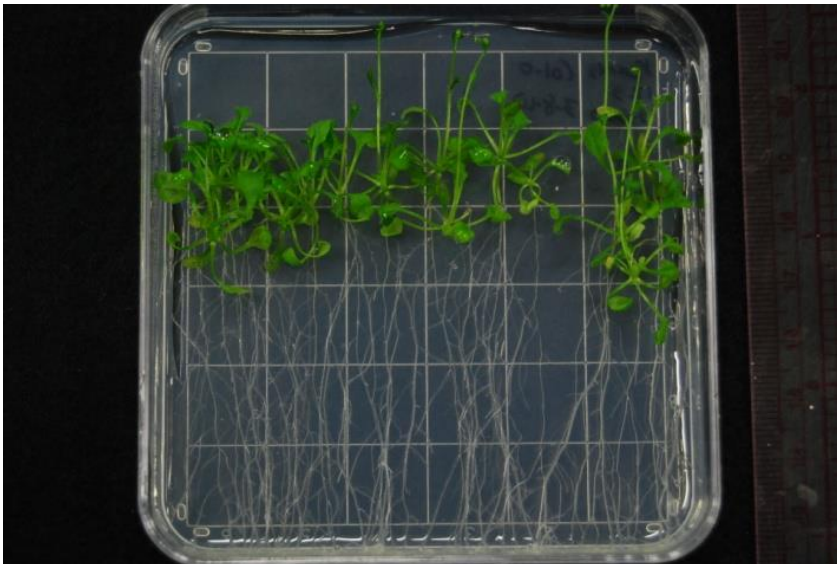

GM18

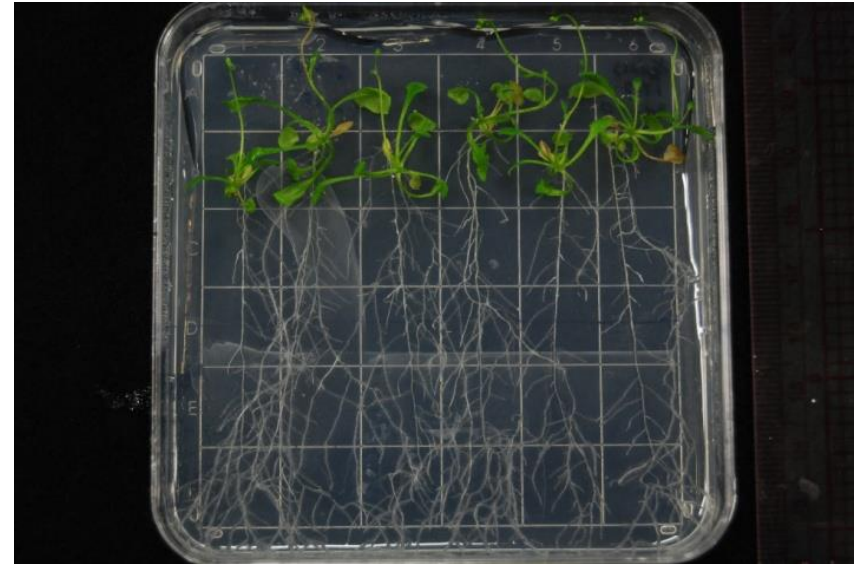

Control

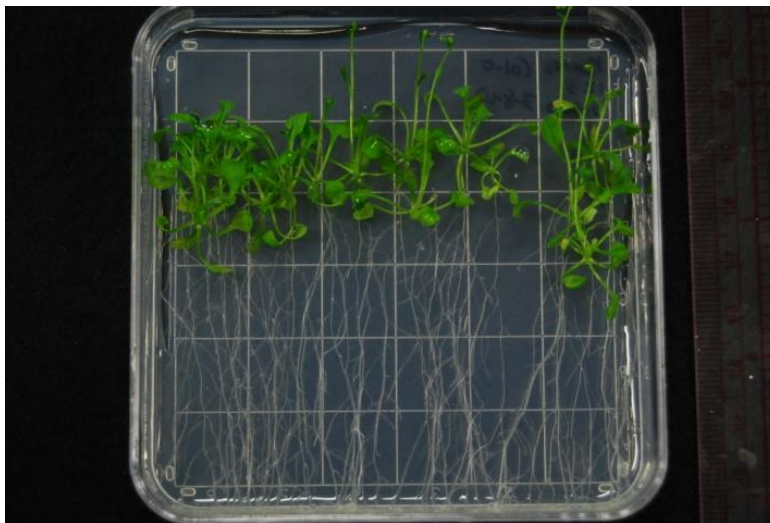

GM21

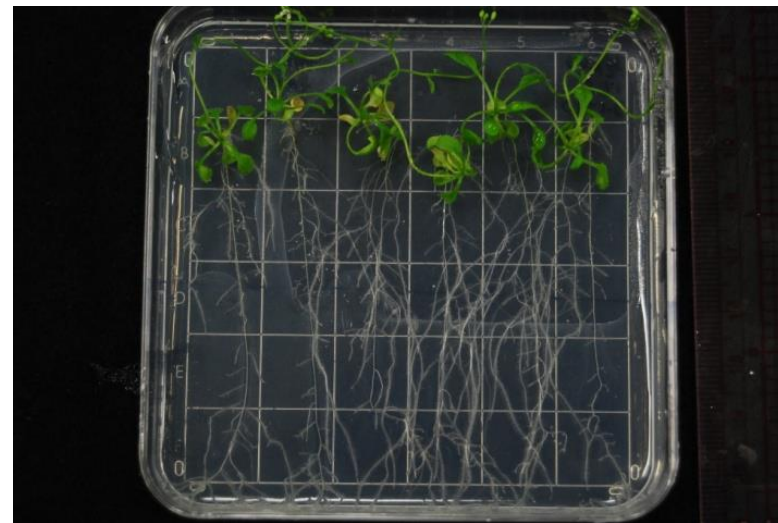

Control

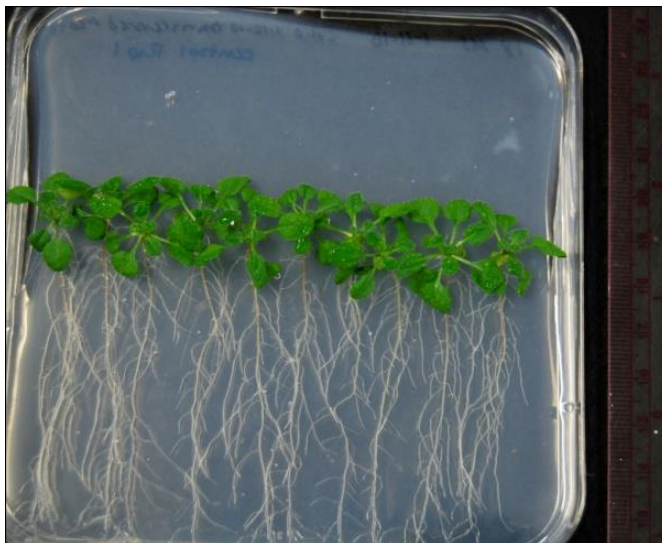

GM24

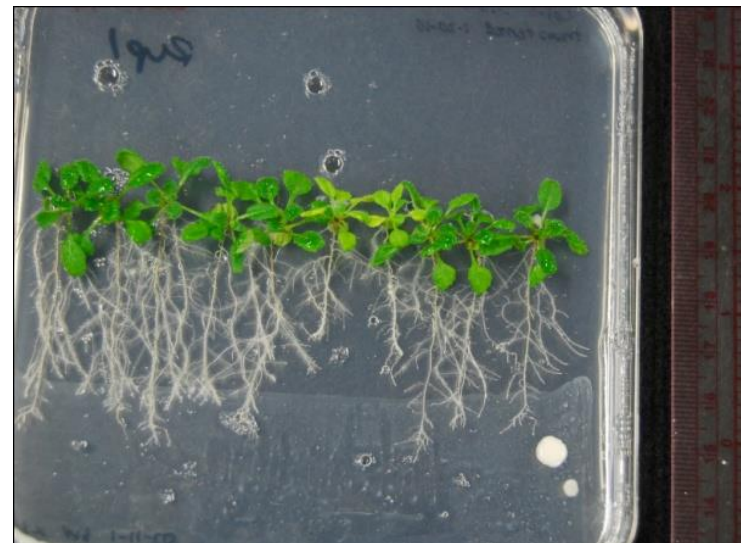



Control

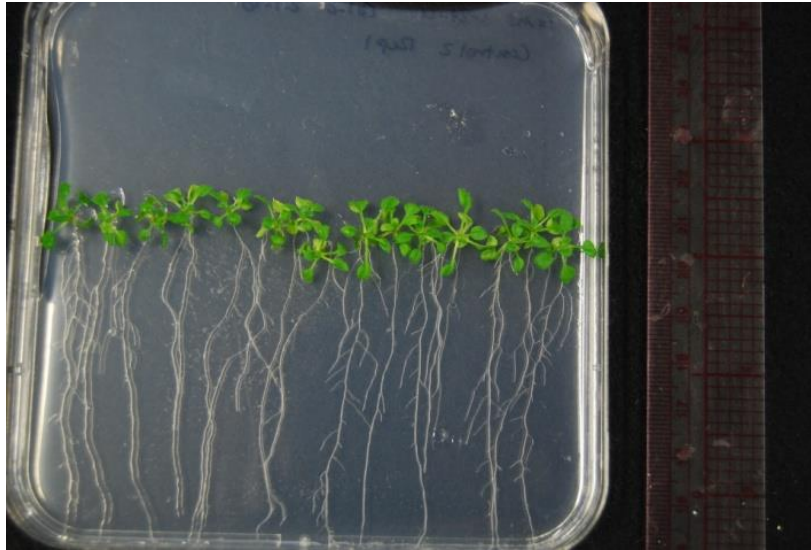

GM30

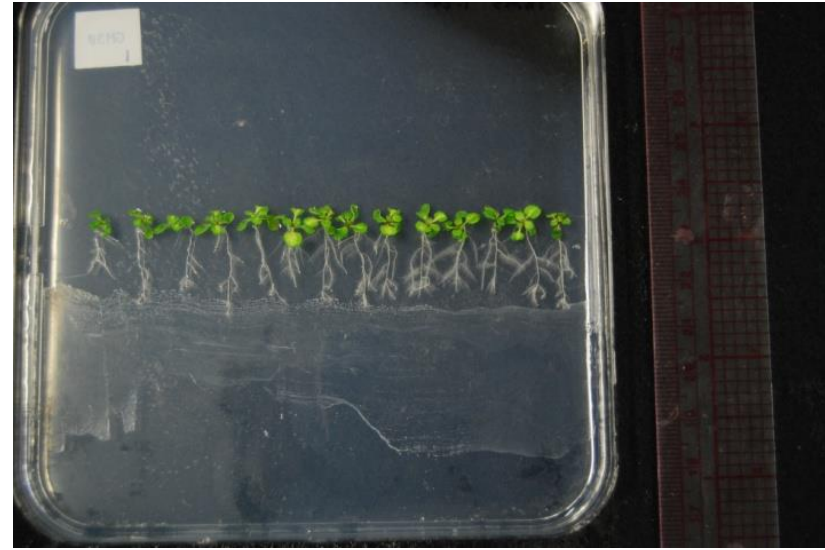

Control

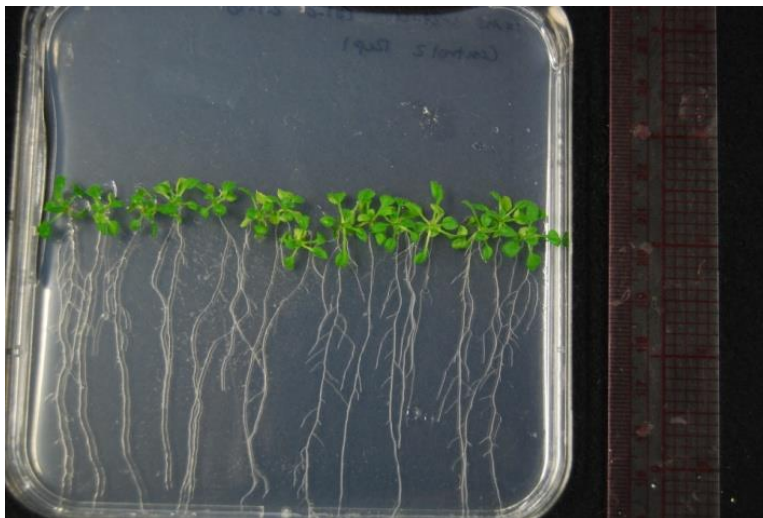

GM33

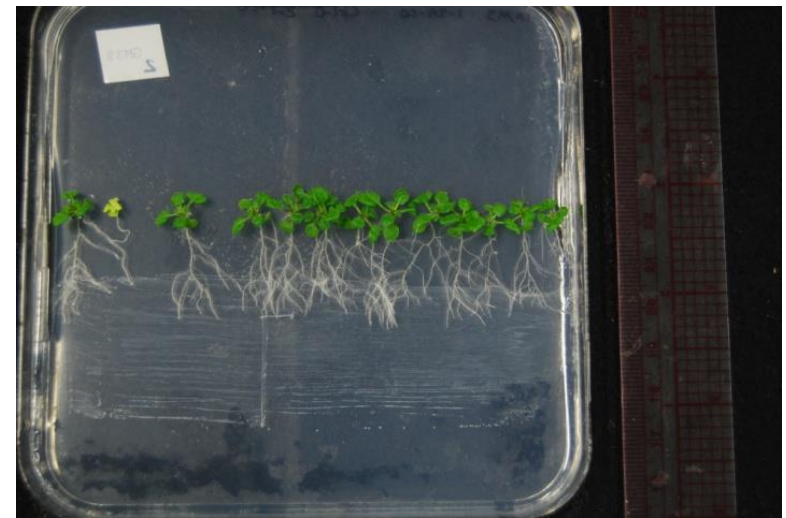

Control

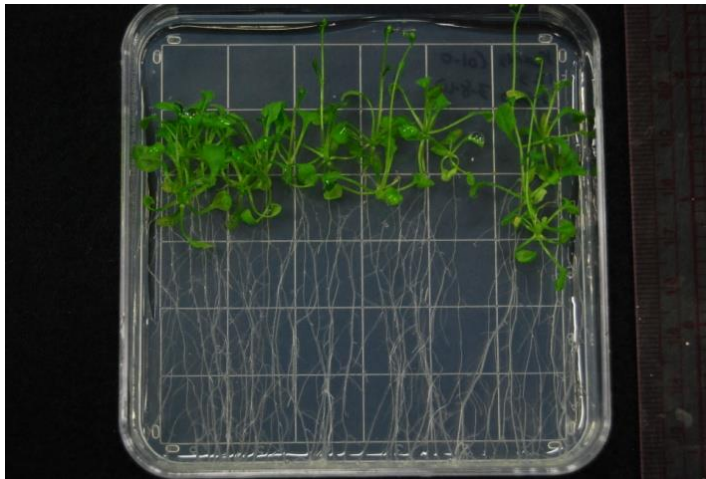

GM41

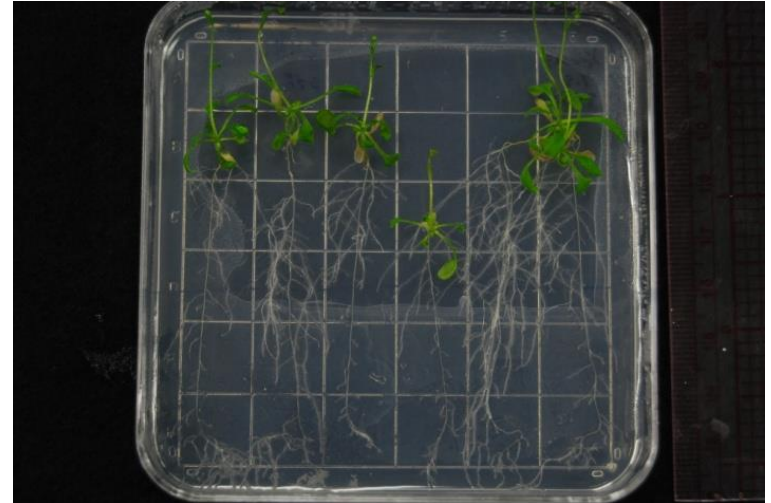

Control

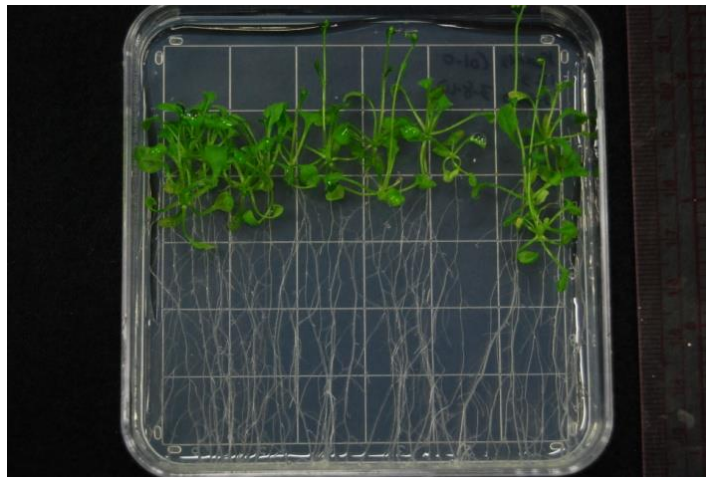

GM50

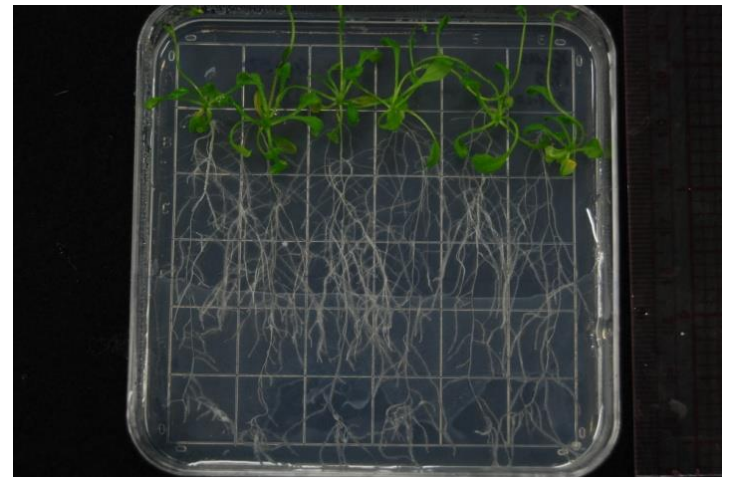



Control

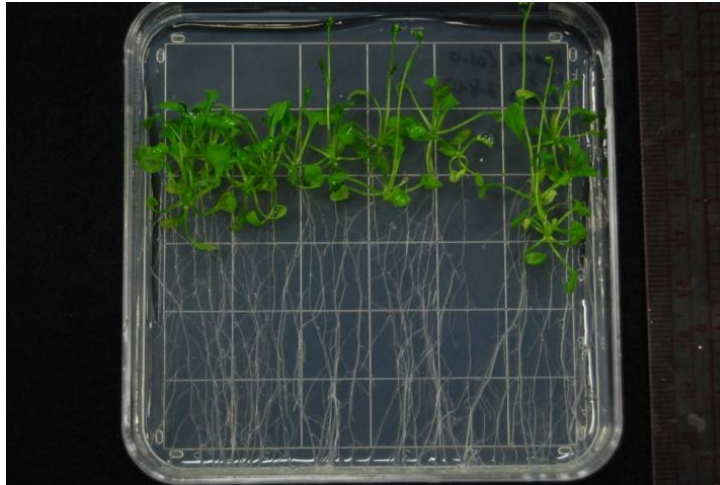

GM55

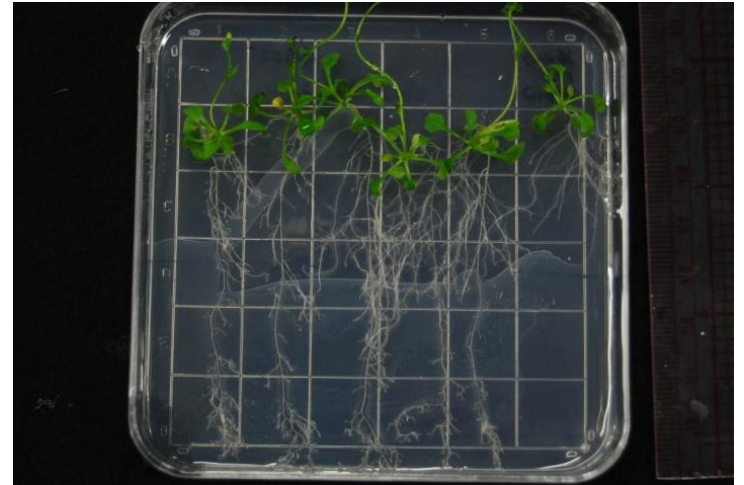

Control

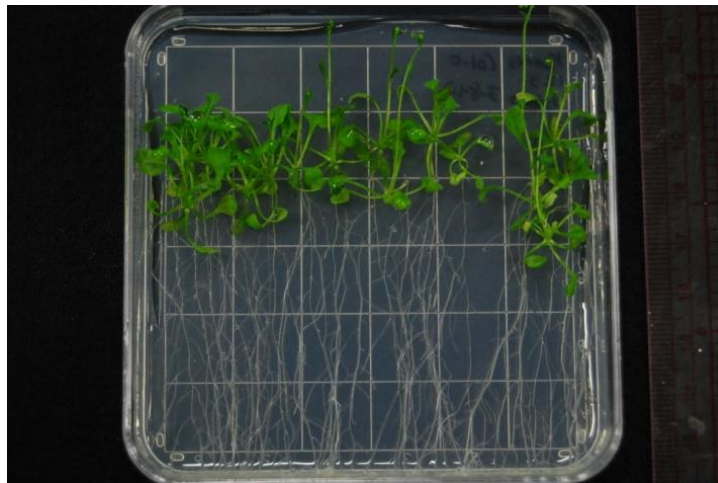

GM60

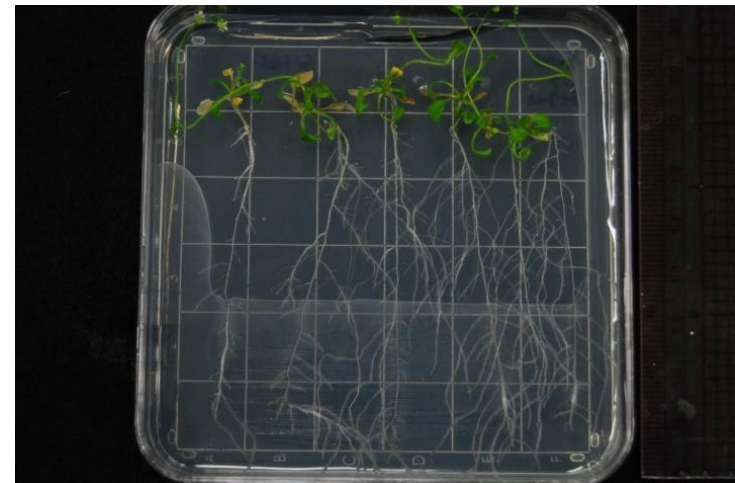



Control

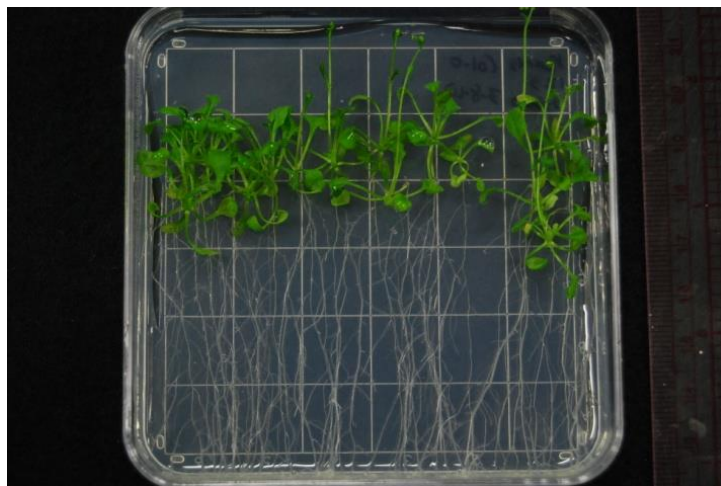

GM67

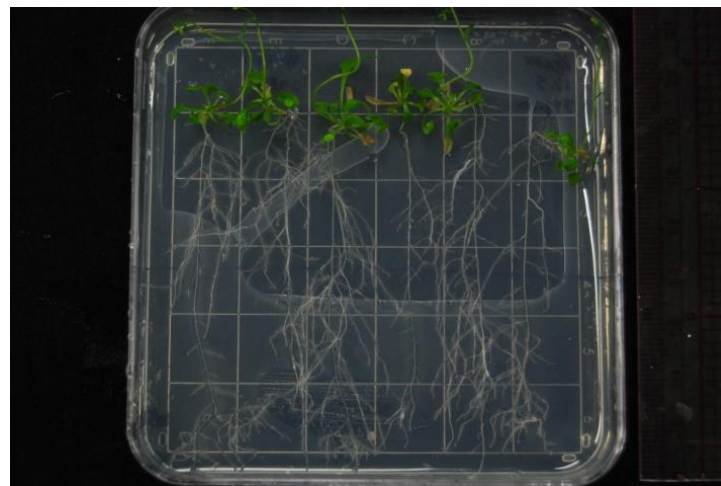

Control

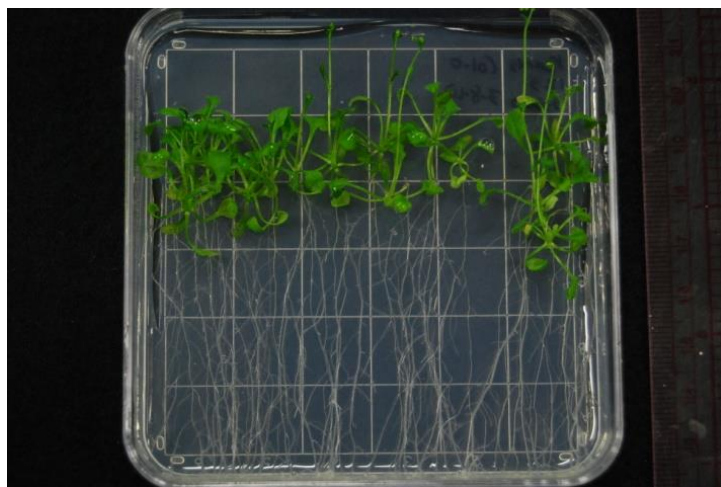

GM78

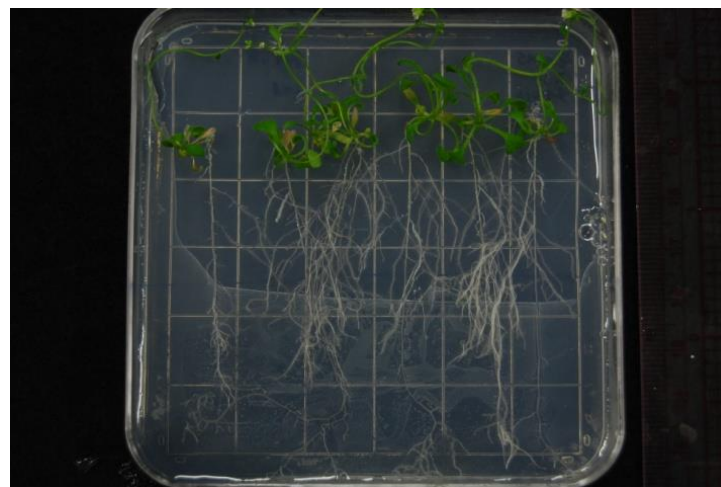

Control

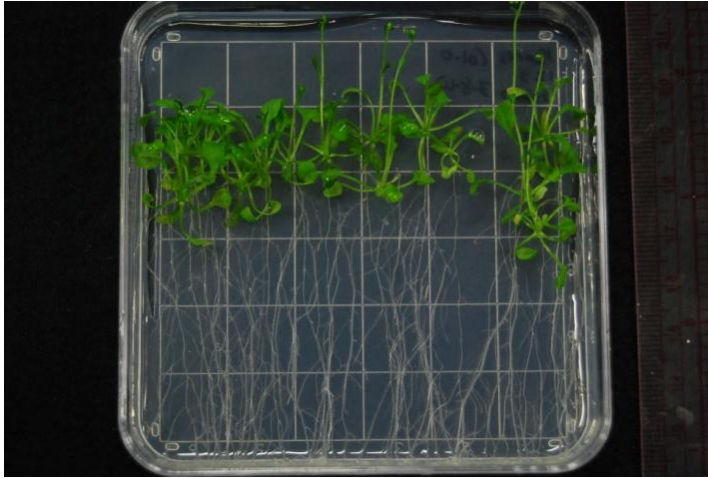

GM79

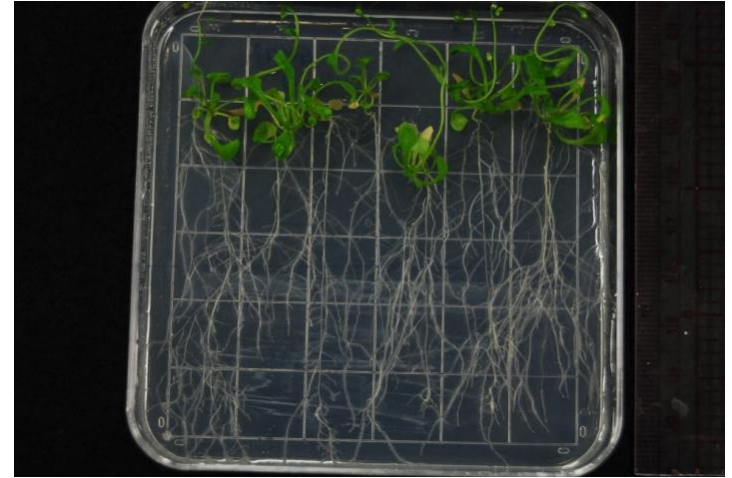

Control

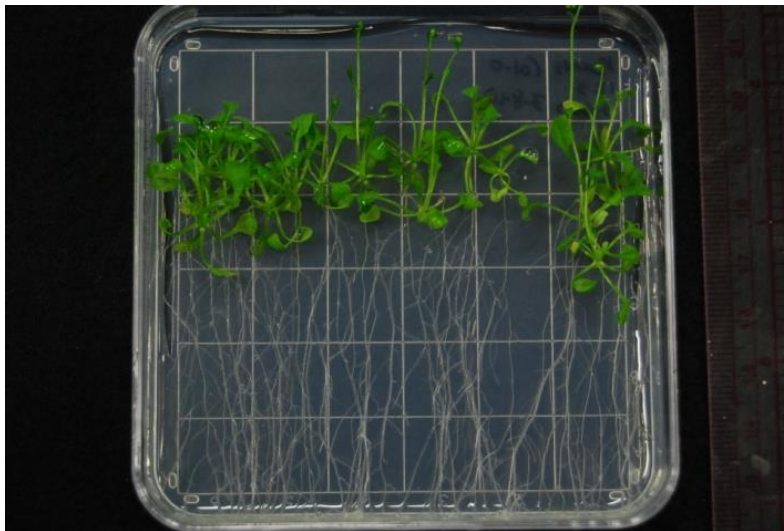

GM80

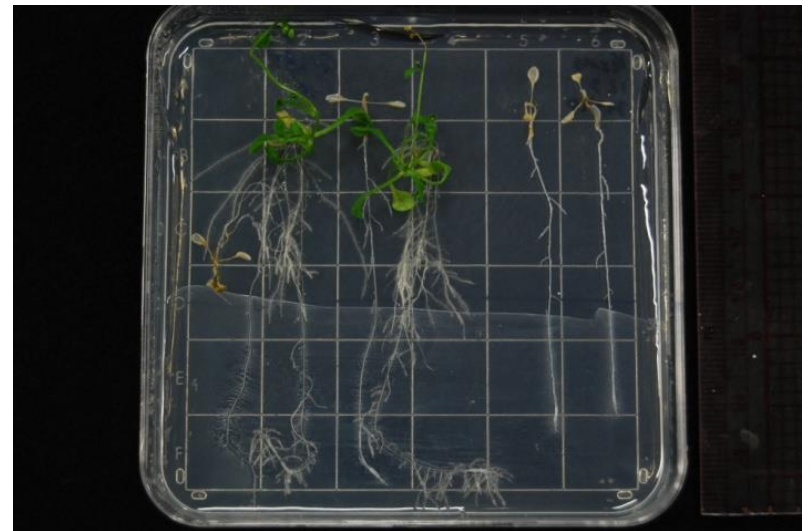



Control

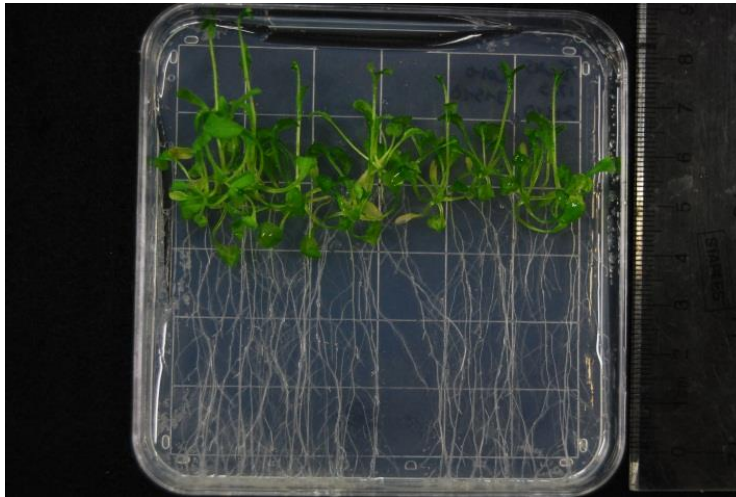

GM102

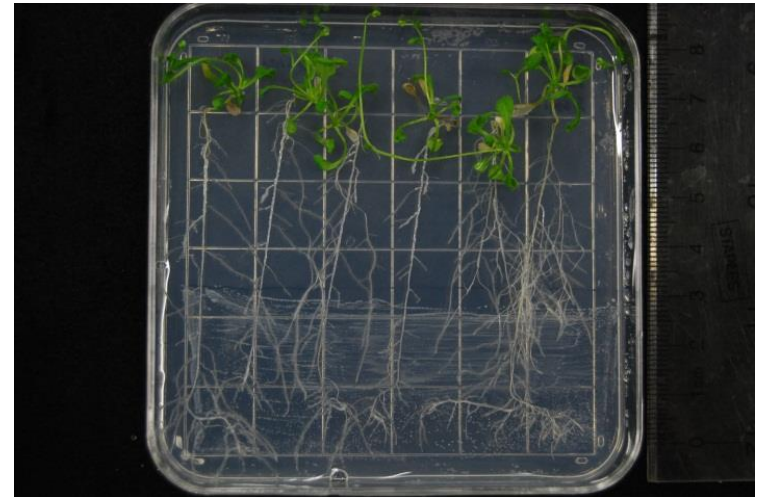

Supplement: Image_1.PDF [file Image_1.PDF]
